# Supplementary material for: Synthesis and characterization of a multi-functional on–off–on fluorescent oxidized graphitic carbon nitride nanosensor for iodide, chromium(vi), and ascorbic acid
Source: Royal Society of Chemistry journal article supplement (doi:10.1039/c9tc03955d), 2019-01-01
Supplement: c9tc03955d1.pdf [file c9tc03955d1.pdf]

## Supporting Information

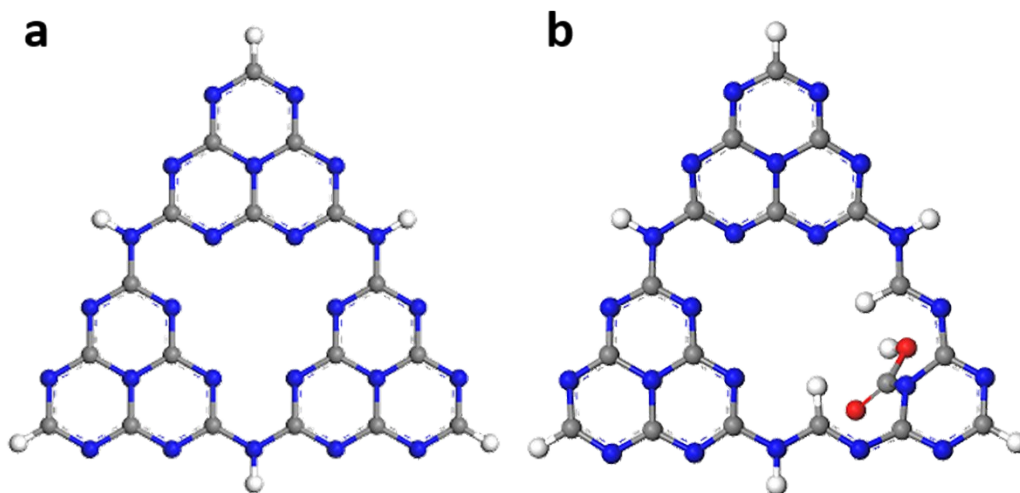

**Figure S1.** Structural models of (a) pristine g-C<sub>3</sub>N<sub>4</sub> and (b) nano-CNO used in the theoretical calculations.

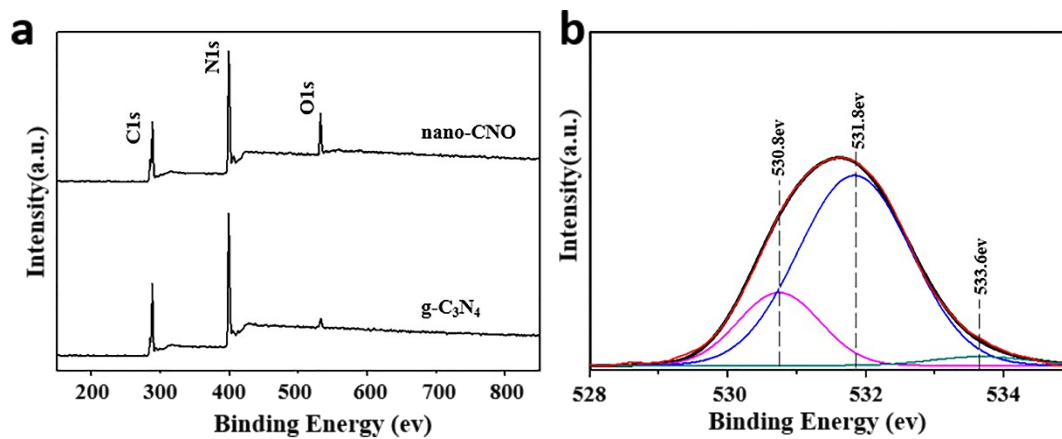

**Figure S2.** XPS spectra of (a) pristine g-C<sub>3</sub>N<sub>4</sub> and nano-CNO, and (b) the O1s spectrum of nano-CNO, 530.8 eV (C=O), 531.8 eV (C-O), 533.6 eV (N-O).

**Table S1.** Values of fluorescence lifetime for nano-CNO with various concentrations of Cr(VI).

| Concentration of Cr(VI) ( $\mu\text{M}$ ) | $\tau_1(\text{ns})$ | $B_1$  | $\tau_2(\text{ns})$ | $B_2$  | $\tau_3(\text{ns})$ | $B_3$  | $\tau(\text{ns})$ |
|-------------------------------------------|---------------------|--------|---------------------|--------|---------------------|--------|-------------------|
| 0                                         | 8.6118              | 0.246  | 37.2836             | 0.3252 | 0.3742              | 0.4288 | 14.40359          |
| 10                                        | 2.9138              | 0.2567 | 13.323              | 0.2318 | 0.3098              | 0.5114 | 3.994676          |
| 20                                        | 2.2422              | 0.1953 | 11.032              | 0.2129 | 0.3011              | 0.5917 | 2.964775          |
| 35                                        | 1.3305              | 0.1514 | 9.3681              | 0.1301 | 0.2923              | 0.7185 | 1.630245          |
| 50                                        | 1.2646              | 0.0909 | 8.7087              | 0.0851 | 0.3569              | 0.8239 | 1.150112          |

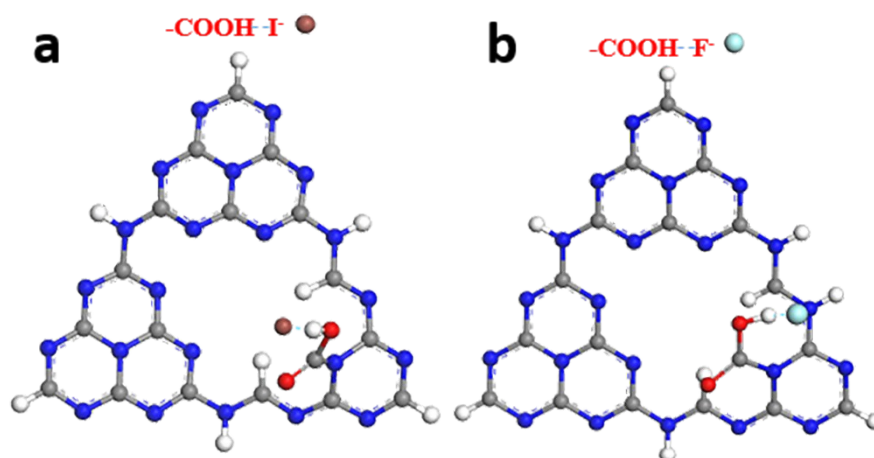

**Figure S3.** Structural models of nano-CNO bonded with (a) I<sup>-</sup> and (b) F<sup>-</sup>.
